# Supplementary material for: A comprehensive analysis of library preparation methods shows high heterogeneity of extrachromosomal circular DNA but distinct chromosomal amount levels reflecting different cell states
Source: Royal Society of Chemistry journal article supplement (doi:10.1039/d3an01300f), 2023-11-15
Supplement: d3an01300f1.xlsx [file d3an01300f1.xlsx]

## Sheet: Figure 2
group	group	sampleid	eccDNA/M reads
sonication	MssI	S-M-R-1	103.663
		S-M-R-2	91.8567
	PacI	S-P-R-1	77.2892
		S-P-R-2	92.2277
	NotI	S-N-R-1	30.2846
		S-N-R-2	26.921
	non	S-non-R-1	11.7197
		S-non-R-2	37.6271
Tn5 tagmentation	MssI	Tn5-M-R-1	85.1989
		Tn5-M-R-2	79.6847
	PacI	Tn5-P-R-1	147.107
		Tn5-P-R-2	197.089
	NotI	Tn5-N-R-1	55.7347
		Tn5-N-R-2	72.0543
	non	Tn5-non-R-1	46.7598
		Tn5-non-R-2	58.2512
Figure 2 (a) Normalized number of detected eccDNA in different groups in RCA samples.
group	sampleid	mtDNA Content
MssI	S-M-R-1	4.15698
	S-M-R-2	3.82597
PacI	S-P-R-1	0.125659
	S-P-R-2	0.196811
NotI	S-N-R-1	69.9392
	S-N-R-2	78.2394
non	S-non-R-1	66.7015
	S-non-R-2	61.5098
MssI	Tn5-M-R-1	2.4317
	Tn5-M-R-2	1.93747
PacI	Tn5-P-R-1	0.0462045
	Tn5-P-R-2	0.0744434
NotI	Tn5-N-R-1	48.3689
	Tn5-N-R-2	59.8477
non	Tn5-non-R-1	52.1008
	Tn5-non-R-2	46.3931
Figure 2 (b) Ratio of mtDNA in different groups in RCA samples.
group	group	Sample ID	Junctional tag=1 (%)
RCA	MssI	Tn5-M-R-1	80.9491
		Tn5-M-R-2	79.7473
	PacI	Tn5-P-R-1	72.2074
		Tn5-P-R-2	70.667
	NotI	Tn5-N-R-1	66.8112
		Tn5-N-R-2	66.1446
	non	Tn5-non-R-1	78.4118
		Tn5-non-R-2	77.8288
non-RCA	MssI	Tn5-M-1	98.7775
		Tn5-M-2	98.9743
	PacI	Tn5-P-1	98.9577
		Tn5-P-2	98.1767
	NotI	Tn5-N-1	99.9078
		Tn5-N-2	99.5221
	non	Tn5-non-1	99.4872
		Tn5-non-2	100
Figure 2 (c) Comparison of the ratio of eccDNAs with a junctional tag equal to 1 between RCA and non-RCA groups
group	group	Sample ID	mtDNA Content
RCA	MssI	Tn5-M-R-1	2.4317
		Tn5-M-R-2	1.93747
	PacI	Tn5-P-R-1	0.0462045
		Tn5-P-R-2	0.0744434
	NotI	Tn5-N-R-1	48.3689
		Tn5-N-R-2	59.8477
	non	Tn5-no-R-1	52.1008
		Tn5-no-R-2	46.3931
non-RCA	MssI	Tn5-M-1	6.75226
		Tn5-M-2	6.17339
	PacI	Tn5-P-1	2.32532
		Tn5-P-2	1.52671
	NotI	Tn5-N-1	87.6987
		Tn5-N-2	86.7588
	non	Tn5-non-1	85.2909
		Tn5-non-2	83.3974
Figure 2 (d) Comparison of the ratio of mtDNA between RCA and nonRCA groups.

## Sheet: Figure 3
S-RCA group	eccDNA content of 200-400 bp size (%)
MssI	18.79	S-M-R-1
MssI	16.92	S-M-R-2
PacI	14.44	S-P-R-1
PacI	16.08	S-P-R-2
NotI	31.47	S-N-R-1
NotI	28.74	S-N-R-2
non-digestion	17.63	S-non-R-1
non-digestion	23.4	S-non-R-2
Figure 3 (b) Comparison of the content of eccDNA in the 200-400 bp size range using different enzymatic digestion methods
Tn5-RCA group	eccDNA content of 200-400 bp size (%)
MssI	17.03	Tn5-M-R-1
MssI	16.06	Tn5-M-R-2
PacI	14.51	Tn5-P-R-1
PacI	14.94	Tn5-P-R-2
NotI	33.25	Tn5-N-R-1
NotI	31.15	Tn5-N-R-2
non-digestion	19.58	Tn5-non-R-1
non-digestion	25.12	Tn5-non-R-2
Figure 3 (c) Comparison of the content of eccDNA in the 200-400 bp size range using different enzymatic digestion methods
Tn5 group	eccDNA content of 200-400 bp size (%)
MssI	37.25	Tn5-M-1
MssI	36.46	Tn5-M-2
PacI	38.84	Tn5-P-1
PacI	37.75	Tn5-P-2
NotI	54.38	Tn5-N-1
NotI	50.06	Tn5-N-2
non-digestion	44.62	Tn5-non-1
non-digestion	42.11	Tn5-non-2
Figure 3 (d) Comparison of the content of eccDNA in the 200-400 bp size range using different enzymatic digestion methods
SampleID	GC content (%)	group
S-M-R-1	43.1	S-RCA
S-M-R-2	43.1	S-RCA
S-P-R-1	43.9	S-RCA
S-P-R-2	41.8	S-RCA
S-N-R-1	40.9	S-RCA
S-N-R-2	41.6	S-RCA
S-non-R-1	45	S-RCA
S-non-R-2	43.1	S-RCA
Tn5-M-R-1	42.8	Tn5-RCA
Tn5-M-R-2	41.7	Tn5-RCA
Tn5-P-R-1	41.9	Tn5-RCA
Tn5-P-R-2	42	Tn5-RCA
Tn5-N-R-1	40.9	Tn5-RCA
Tn5-N-R-2	42.8	Tn5-RCA
Tn5-non-R-1	41.3	Tn5-RCA
Tn5-non-R-2	41.2	Tn5-RCA
Tn5-M-1	41.2	Tn5-nonRCA
Tn5-M-2	41.7	Tn5-nonRCA
Tn5-P-1	42	Tn5-nonRCA
Tn5-P-2	43.1	Tn5-nonRCA
Tn5-N-1	41.4	Tn5-nonRCA
Tn5-N-2	43.1	Tn5-nonRCA
Tn5-non-1	42.3	Tn5-nonRCA
Tn5-non-2	42	Tn5-nonRCA
Figure 3 (e) Comparison of the GC content in different treatment groups
SampleID	GC content of 200-400 bp size (%)	group
S-M-R-1	49.5	S-RCA
S-M-R-2	50.4	S-RCA
S-P-R-1	49.3	S-RCA
S-P-R-2	49.5	S-RCA
S-N-R-1	52.7	S-RCA
S-N-R-2	52.9	S-RCA
S-non-R-1	51.6	S-RCA
S-non-R-2	52.5	S-RCA
Tn5-M-R-1	49.3	Tn5-RCA
Tn5-M-R-2	50.7	Tn5-RCA
Tn5-P-R-1	46.3	Tn5-RCA
Tn5-P-R-2	47.8	Tn5-RCA
Tn5-N-R-1	51.3	Tn5-RCA
Tn5-N-R-2	51.2	Tn5-RCA
Tn5-non-R-1	50.9	Tn5-RCA
Tn5-non-R-2	51.2	Tn5-RCA
Tn5-M-1	45.1	Tn5-nonRCA
Tn5-M-2	45.5	Tn5-nonRCA
Tn5-P-1	45.8	Tn5-nonRCA
Tn5-P-2	47.2	Tn5-nonRCA
Tn5-N-1	42.8	Tn5-nonRCA
Tn5-N-2	43.9	Tn5-nonRCA
Tn5-non-1	43.1	Tn5-nonRCA
Tn5-non-2	41	Tn5-nonRCA
Figure 3 (f) Comparison of the GC content in different treatment groups

## Sheet: Figure 4
chromosome	Tn5-non-R-1	Tn5-non-R-2
chr1	5.33728	5.32709
chr2	4.07983	3.68956
chr3	3.82558	4.02046
chr4	3.09904	2.82066
chr5	4.61787	3.61108
chr6	4.22911	3.94858
chr7	4.321	4.2207
chr8	3.21259	3.14998
chr9	3.10729	3.79491
chr10	4.74885	5.2102
chr11	4.07759	3.70603
chr12	4.83997	4.22418
chr13	3.95032	3.65071
chr14	3.70138	3.6886
chr15	3.5768	3.01926
chr16	4.70675	4.5589
chr17	6.55792	6.64845
chr18	2.76539	3.19671
chr19	7.99566	7.86389
chr20	5.09843	5.24741
chr21	3.31018	3.80184
chr22	4.9917	6.39415
chrX	3.6384	4.1406
Figure 4 (a) The distribution trend of eccDNAs across chromosomes is similar in replicates.
chromosome	S-non-R-1	S-non-R-2	S-N-R-1	S-N-R-2	Tn5-non-R-1	Tn5-non-R-2	Tn5-N-R-1	Tn5-N-R-2	S-M-R-1	S-M-R-2	Tn5-M-R-1	Tn5-M-R-2	S-P-R-1	S-P-R-2	Tn5-P-R-1	Tn5-P-R-2	Tn5-M-1	Tn5-M-2	Tn5-P-1	Tn5-P-2	Tn5-N-1	Tn5-N-2	Tn5-non-1	Tn5-non-2
1	4.95789	5.38034	5.37507	4.525	5.33728	5.32709	5.08799	4.92758	6.91818	4.38487	6.67617	5.02216	5.31033	4.88521	4.82328	4.89812	4.7322	5.03414	4.54971	4.73972	4.9866	5.23624	3.83367	7.55899
2	4.47651	3.75662	3.93573	3.07677	4.07983	3.68956	3.82759	3.47018	3.10251	3.93267	3.16061	3.8528	3.26117	3.77723	4.07801	3.99569	4.02997	4.24951	4.02902	3.79786	3.95857	4.08548	5.62961	5.82755
3	4.12165	4.39707	3.79014	3.13895	3.82558	4.02046	3.71139	3.55394	3.17906	3.36668	3.46356	3.9845	3.89764	3.7257	4.56888	4.16198	4.27642	4.27374	4.01246	4.08841	4.64895	4.03945	3.43793	4.74509
4	2.3676	2.59088	2.21651	2.69619	3.09904	2.82066	2.67858	2.78098	2.17489	2.53796	2.47497	2.99995	2.85139	3.21095	4.04236	3.82594	3.49035	3.61972	3.51603	3.1679	3.48945	4.12849	4.30079	4.32834
5	4.04271	3.20197	3.19756	2.99407	4.61787	3.61108	3.53749	3.29729	2.43386	2.68322	3.08852	3.33053	3.43582	4.02554	4.27693	4.22374	4.2205	4.29507	3.83705	4.02199	3.85934	3.8067	4.88186	4.53521
6	5.37091	4.36492	3.47002	3.49015	4.22911	3.94858	3.88405	3.77953	3.92137	3.75574	4.45233	4.07864	4.20739	4.15356	4.63361	4.90035	4.55993	4.47341	4.38137	4.24032	5.685	5.42517	5.18861	5.50876
7	3.34963	3.76686	4.37147	4.26382	4.321	4.2207	4.18559	4.08412	3.35565	3.72561	3.65189	4.4786	4.59508	5.15527	4.69583	5.3691	4.1742	4.47219	4.71532	4.4136	5.32248	4.534	4.27828	3.69059
8	2.18353	3.43907	3.28379	2.74832	3.21259	3.14998	2.88883	3.06919	2.81157	2.90666	3.46733	3.26825	3.36325	3.74877	3.71299	4.08661	3.99093	3.77896	3.79604	3.79325	3.81097	4.54497	4.69708	3.24149
9	2.77202	3.05881	3.31135	3.07228	3.10729	3.79491	3.06795	3.14332	2.52154	3.17401	2.80617	3.17172	3.18423	3.41111	3.22232	3.41168	3.63859	3.28534	3.79662	3.43232	3.19734	3.29112	4.92596	3.39944
10	4.73723	4.95837	4.38417	4.2262	4.74885	5.2102	4.48237	4.65589	6.37322	4.48577	6.0385	4.71998	4.78844	4.14627	4.83467	4.31635	5.34732	4.95127	5.52595	4.8863	5.42014	3.87374	6.62378	2.63719
11	3.70423	4.4901	3.12105	3.43955	4.07759	3.70603	3.31333	3.38775	2.72912	3.46101	2.87489	3.43807	3.16183	4.00798	3.25954	4.01518	3.39156	3.28381	3.4784	3.54122	3.27564	2.67412	2.5233	2.61202
12	4.00487	4.4089	4.03456	4.1112	4.83997	4.22418	4.22118	4.34772	4.79336	3.44278	5.02213	4.00539	4.57829	4.60278	4.74794	4.69925	4.32776	4.2131	4.27474	4.42686	5.34915	5.30307	4.09214	5.29503
13	3.93787	3.4253	1.97685	2.37635	3.95032	3.65071	2.83085	3.04303	2.60843	2.90922	3.02456	3.57817	3.23085	3.38158	4.79421	3.94942	3.78076	4.044	3.63611	3.36098	5.1589	4.53198	6.55711	2.05687
14	2.64896	3.83662	3.93869	5.65101	3.70138	3.6886	4.04912	4.1127	7.12479	7.59778	3.59304	4.43136	5.35187	5.18255	4.14854	4.39267	3.33998	3.11568	3.35185	3.63787	3.44482	3.08122	3.82121	2.19754
15	2.61665	2.72576	3.71443	4.77055	3.5768	3.01926	4.05891	4.17995	2.95247	2.98498	3.13437	3.30421	3.68927	2.92885	3.59002	3.16598	3.61374	3.65962	3.53262	3.83454	4.5796	3.54185	4.01051	2.3064
16	6.46226	4.19639	5.74924	5.09478	4.70675	4.5589	5.73788	4.69986	5.109	3.41816	5.93005	3.63638	4.84058	4.60568	4.18821	4.44906	5.20739	4.98253	5.34265	5.36036	4.2179	3.30329	3.77319	2.6039
17	8.01356	7.20938	8.51331	7.16019	6.55792	6.64845	8.09577	7.08507	5.74632	5.40659	6.20941	6.10555	6.35158	5.3818	5.22099	5.44845	5.59622	5.85224	5.88719	6.05818	5.75769	5.47066	2.45645	5.65073
18	2.90539	2.90862	2.88892	2.29058	2.76539	3.19671	3.03755	2.53304	1.82077	2.00215	2.36159	2.60737	3.66934	2.78746	3.86644	2.76736	3.31841	3.1689	2.92315	2.82975	3.36448	4.68991	0.848201	1.46337
19	10.2438	7.97629	13.2385	11.7403	7.99566	7.86389	10.7141	10.5085	8.11376	7.97602	7.94609	8.16473	7.98052	7.00703	5.74992	6.17431	5.1432	5.35627	5.3014	5.98465	2.93566	5.09085	8.14105	4.013
20	4.91766	4.80407	3.60299	5.78154	5.09843	5.24741	4.06288	5.96728	4.89101	4.48791	5.13494	4.65806	4.99713	4.75944	4.61818	4.45048	5.35104	5.19545	5.36952	5.74309	4.1961	4.87429	4.23143	16.4258
21	3.928	3.78744	2.35465	3.56601	3.31018	3.80184	3.10571	3.27824	3.61498	5.30727	4.01009	5.39589	3.99147	4.73925	4.1606	4.11433	4.37004	4.32311	4.54773	4.11449	3.15775	4.70742	4.37847	2.51801
22	4.92332	7.0868	6.25238	6.90044	4.9917	6.39415	5.98774	6.60851	9.80202	12.2383	7.32264	6.71504	5.3364	6.19301	3.9166	4.60715	4.95853	5.0375	5.03676	5.68103	5.32118	3.70872	2.68299	2.31444
X	3.31369	4.00861	3.17183	2.80912	3.6384	4.1406	3.18584	3.33427	3.60708	3.77665	3.54518	4.58254	3.86689	4.13636	4.55462	4.26997	4.5405	4.41246	4.35821	4.30271	4.64751	5.23395	3.49512	3.01501
Figure 4 (b) Pearson correlation analysis of eccDNA distribution on chromosomes across all treatment groups.

## Sheet: Figure 5
group	MssI	MssI	PacI	PacI	NotI	NotI	non-digestion	non-digestion	MssI	MssI	PacI	PacI	NotI	NotI	non-digestion	non-digestion	non-RCA	non-RCA	non-RCA	non-RCA	non-RCA	non-RCA	non-RCA	non-RCA
element	S-M-R-1	S-M-R-2	S-P-R-1	S-P-R-2	S-N-R-1	S-N-R-2	S-non-R-1	S-non-R-2	Tn5-M-R-1	Tn5-M-R-2	Tn5-P-R-1	Tn5-P-R-2	Tn5-N-R-1	Tn5-N-R-2	Tn5-non-R-1	Tn5-non-R-2	Tn5-M-1	Tn5-M-2	Tn5-P-1	Tn5-P-2	Tn5-N-1	Tn5-N-2	Tn5-non-1	Tn5-non-2
CpG	5.42138	6.30826	5.74975	5.87376	7.83845	8.06987	8.34921	7.62605	5.85674	6.42936	3.55206	4.63971	5.82567	5.83206	6.88817	5.94813	3.33321	3.40531	3.52952	4.23679	1.34894	2.06656	3.41165	8.17001
Alu	4.54338	4.35335	4.69169	5.23678	6.81852	6.12031	7.59989	7.00426	5.66211	5.98492	4.38934	5.23629	6.52706	6.10919	6.96824	6.72035	3.33661	3.35759	3.24004	3.41934	2.50629	2.73974	3.33021	2.7592
5UTR	14.0819	13.763	12.699	14.5152	16.6226	17.3342	21.579	23.2405	16.2985	16.1333	10.6512	13.5121	13.9677	12.5997	20.8119	19.3487	7.7499	8.04558	8.19634	9.26816	5.66066	7.3379	6.63084	14.1778
3UTR	3.75602	3.61084	3.90194	3.72476	4.54837	4.17987	6.21889	4.95922	4.40626	4.42883	3.39018	3.89937	3.66784	3.6186	5.54493	5.12768	2.72912	2.71407	2.7236	3.12245	2.52532	2.29149	1.40511	1.80261
exon	3.56424	3.79753	3.68745	4.17664	4.56011	4.48224	6.24397	5.98311	4.15583	5.08566	3.56271	4.247	4.00298	3.91856	5.72472	5.39195	3.10833	3.04816	3.11919	3.39421	2.6712	2.88556	2.81493	2.88901
intron	0.84627	0.822563	0.805256	0.977699	1.14267	1.11227	1.09468	1.18676	1.02199	1.10853	0.940384	1.08869	1.14192	1.12103	1.14863	1.1547	1.05557	1.05969	1.04907	1.06899	1.03186	1.12015	1.09359	1.08044
intergenic	0.731568	0.70346	0.668063	0.823009	0.819654	0.859356	0.956122	0.851218	1.00684	0.907851	0.806729	0.901374	0.813536	0.836591	0.886155	0.85528	0.881356	0.879895	0.882151	0.860058	0.884641	0.81218	0.822199	0.9751
Figure 5. Comparison of normalized counts of eccDNAs across genomic elements

## Sheet: Figure 6
position	A	C	G	T		position	A	C	G	T		position	A	C	G	T		position	A	C	G	T
p_1	0.272097	0.219698	0.231483	0.276722		p_1	0.28028	0.226276	0.24433	0.249113		p_1	0.265106	0.208183	0.232693	0.294018		p_1	0.286415	0.218387	0.223089	0.272109
p_10	0.24821	0.194925	0.273174	0.283691		p_10	0.261371	0.215001	0.282117	0.241511		p_10	0.246499	0.208283	0.234894	0.310324		p_10	0.263005	0.238195	0.241697	0.257103
p_11	0.193183	0.301812	0.218051	0.286954		p_11	0.192227	0.262543	0.275054	0.270176		p_11	0.236495	0.245298	0.237795	0.280412		p_11	0.261204	0.226791	0.228091	0.283914
p_12	0.277165	0.277102	0.25594	0.189793		p_12	0.286741	0.216711	0.30375	0.192797		p_12	0.262105	0.220088	0.241096	0.276711		p_12	0.277111	0.237295	0.244798	0.240796
p_13	0.24273	0.276215	0.220364	0.260692		p_13	0.284556	0.277208	0.195996	0.24224		p_13	0.244098	0.230592	0.2491	0.27621		p_13	0.289516	0.231593	0.205882	0.273009
p_14	0.193626	0.281664	0.17804	0.34667		p_14	0.239231	0.250095	0.160142	0.350532		p_14	0.235894	0.253301	0.210984	0.29982		p_14	0.269608	0.232793	0.204282	0.293317
p_15	0.212095	0.243046	0.180637	0.364221		p_15	0.236127	0.226023	0.181965	0.355885		p_15	0.259204	0.222389	0.227991	0.290416		p_15	0.265706	0.215686	0.214886	0.303721
p_16	0.229931	0.281886	0.176931	0.311253		p_16	0.252502	0.256018	0.173223	0.318257		p_16	0.242597	0.242497	0.209784	0.305122		p_16	0.280312	0.230292	0.209284	0.280112
p_17	0.294938	0.257777	0.193499	0.253786		p_17	0.311605	0.228335	0.20667	0.253389		p_17	0.257903	0.228792	0.239396	0.27391		p_17	0.284714	0.219188	0.209684	0.286415
p_18	0.267788	0.266014	0.194703	0.271495		p_18	0.289244	0.243982	0.199164	0.267611		p_18	0.244998	0.245598	0.215586	0.293818		p_18	0.282213	0.228091	0.228892	0.260804
p_19	0.264874	0.244979	0.204365	0.285782		p_19	0.286298	0.231693	0.205942	0.276067		p_19	0.268007	0.22499	0.22619	0.280812		p_19	0.277111	0.227091	0.210184	0.285614
p_2	0.27688	0.209751	0.230248	0.283121		p_2	0.269764	0.219593	0.257317	0.253326		p_2	0.266707	0.211184	0.216287	0.305822		p_2	0.273709	0.215186	0.239196	0.271909
p_20	0.242381	0.270988	0.202718	0.283913		p_20	0.276384	0.235969	0.209901	0.277746		p_20	0.248399	0.235294	0.219488	0.296819		p_20	0.283513	0.218187	0.218087	0.280212
p_21	0.248559	0.263828	0.220649	0.266964		p_21	0.278601	0.230679	0.214462	0.276257		p_21	0.257303	0.235194	0.228091	0.279412		p_21	0.281112	0.222589	0.215986	0.280312
p_3	0.279351	0.211113	0.238738	0.270798		p_3	0.281262	0.206227	0.265647	0.246864		p_3	0.267907	0.220188	0.233093	0.278812		p_3	0.283814	0.211485	0.230592	0.27411
p_4	0.277007	0.205411	0.225781	0.291801		p_4	0.285696	0.202173	0.24338	0.268751		p_4	0.268107	0.205282	0.230092	0.296519		p_4	0.282013	0.221789	0.227191	0.269008
p_5	0.265285	0.198315	0.245422	0.290978		p_5	0.270429	0.193779	0.269733	0.266059		p_5	0.271309	0.206983	0.235794	0.285914		p_5	0.284314	0.210984	0.232893	0.271809
p_6	0.249984	0.20804	0.234049	0.307926		p_6	0.251964	0.194033	0.257855	0.296148		p_6	0.266607	0.211585	0.229792	0.292017		p_6	0.272509	0.223689	0.232593	0.271208
p_7	0.315878	0.178103	0.253089	0.25293		p_7	0.312904	0.174173	0.285791	0.227132		p_7	0.277611	0.204182	0.239996	0.278211		p_7	0.286715	0.216287	0.239996	0.257003
p_8	0.359818	0.185833	0.22464	0.229709		p_8	0.372387	0.180445	0.235462	0.211707		p_8	0.27421	0.208483	0.230592	0.286715		p_8	0.289016	0.230192	0.236995	0.243798
p_9	0.353165	0.16258	0.251568	0.232687		p_9	0.352242	0.175535	0.280343	0.191879		p_9	0.279012	0.198379	0.242597	0.280012		p_9	0.293117	0.212985	0.238195	0.255702
Tn5-M Start						Tn5-M End						Tn5-M-RCA Start						Tn5-M-RCA End
position	A	C	G	T		position	A	C	G	T		position	A	C	G	T		position	A	C	G	T
p_1	0.266897	0.221799	0.23117	0.280134		p_1	0.272371	0.227512	0.249004	0.251113		p_1	0.289624	0.210746	0.209334	0.290297		p_1	0.304573	0.215804	0.217081	0.262542
p_10	0.245344	0.201944	0.280485	0.272227		p_10	0.254451	0.228684	0.278988	0.237878		p_10	0.259566	0.206913	0.221101	0.31242		p_10	0.292737	0.230935	0.222327	0.254001
p_11	0.192164	0.304557	0.212604	0.290676		p_11	0.187807	0.264113	0.280394	0.267686		p_11	0.216798	0.294197	0.212965	0.276041		p_11	0.256557	0.237592	0.209818	0.296032
p_12	0.263324	0.288743	0.258815	0.189118		p_12	0.29275	0.21375	0.302237	0.191263		p_12	0.30731	0.249479	0.208863	0.234349		p_12	0.279691	0.229321	0.279489	0.2115
p_13	0.240658	0.285112	0.220335	0.253895		p_13	0.280803	0.274654	0.202858	0.241684		p_13	0.278058	0.252908	0.201399	0.267635		p_13	0.332885	0.242233	0.178749	0.246133
p_14	0.192925	0.287572	0.171255	0.348249		p_14	0.228566	0.257613	0.161513	0.352307		p_14	0.241409	0.259028	0.173156	0.326407		p_14	0.269603	0.237727	0.171822	0.320847
p_15	0.210613	0.24429	0.180508	0.364589		p_15	0.23003	0.233661	0.185582	0.350726		p_15	0.254791	0.223388	0.179813	0.342008		p_15	0.278077	0.223067	0.179018	0.319839
p_16	0.226309	0.284233	0.17799	0.311468		p_16	0.245432	0.262649	0.174104	0.317814		p_16	0.250958	0.261583	0.181158	0.306301		p_16	0.285474	0.234902	0.186886	0.292737
p_17	0.289973	0.2594	0.200656	0.249971		p_17	0.310319	0.229855	0.211584	0.248243		p_17	0.304754	0.237375	0.189631	0.26824		p_17	0.317888	0.226429	0.188366	0.267317
p_18	0.265316	0.274804	0.190875	0.269006		p_18	0.280276	0.254861	0.204029	0.260834		p_18	0.276646	0.261045	0.186067	0.276242		p_18	0.311231	0.230397	0.18386	0.274512
p_19	0.26637	0.252313	0.202823	0.278494		p_19	0.289353	0.232022	0.208128	0.270497		p_19	0.295542	0.237308	0.188555	0.278596		p_19	0.298252	0.220915	0.197714	0.28312
p_2	0.272168	0.220042	0.238491	0.269298		p_2	0.263118	0.226224	0.265987	0.244671		p_2	0.291574	0.213974	0.208123	0.286329		p_2	0.300067	0.223605	0.220713	0.255615
p_20	0.235621	0.270353	0.215532	0.278494		p_20	0.268271	0.24268	0.216034	0.273015		p_20	0.26824	0.259633	0.190303	0.281824		p_20	0.288635	0.227505	0.199126	0.284734
p_21	0.250146	0.262329	0.218929	0.268596		p_21	0.275006	0.232783	0.219372	0.272839		p_21	0.279806	0.241477	0.194338	0.284379		p_21	0.29879	0.231137	0.194956	0.275118
p_3	0.277205	0.219866	0.23609	0.266838		p_3	0.280335	0.203268	0.273717	0.24268		p_3	0.290297	0.223926	0.20819	0.277587		p_3	0.30881	0.208339	0.227841	0.25501
p_4	0.274335	0.211257	0.227598	0.28681		p_4	0.274479	0.207484	0.247833	0.270204		p_4	0.28801	0.216125	0.203685	0.292179		p_4	0.2961	0.207465	0.215938	0.280498
p_5	0.263149	0.202999	0.249092	0.28476		p_5	0.265987	0.197236	0.273659	0.263118		p_5	0.285186	0.209266	0.213167	0.292381		p_5	0.306859	0.199731	0.226429	0.26698
p_6	0.241595	0.21073	0.23855	0.309125		p_6	0.253338	0.1987	0.256032	0.29193		p_6	0.272746	0.212158	0.209535	0.305561		p_6	0.287492	0.204775	0.221251	0.286483
p_7	0.310589	0.181855	0.258405	0.249151		p_7	0.306395	0.176037	0.289002	0.228566		p_7	0.319548	0.183781	0.222984	0.273687		p_7	0.330666	0.199664	0.220982	0.248689
p_8	0.354808	0.1825	0.233044	0.229647		p_8	0.36888	0.178262	0.24104	0.211818		p_8	0.337166	0.197969	0.203349	0.261516		p_8	0.353127	0.2039	0.212441	0.230531
p_9	0.351997	0.165515	0.252138	0.23035		p_9	0.343465	0.17428	0.289178	0.193078		p_9	0.338377	0.180149	0.214175	0.267299		p_9	0.337794	0.195763	0.236046	0.230397
Tn5-P Start						Tn5-P End						Tn5-P-RCA Start						Tn5-P-RCA End
position	A	C	G	T		position	A	C	G	T		position	A	C	G	T		position	A	C	G	T
p_1	0.266147	0.214781	0.23342	0.285652		p_1	0.2772	0.23472	0.229952	0.258127		p_1	0.291102	0.263995	0.178354	0.266549		p_1	0.33903	0.252995	0.186211	0.221764
p_10	0.256177	0.211097	0.227568	0.305158		p_10	0.247941	0.256394	0.244473	0.251192		p_10	0.292673	0.267335	0.189747	0.250246		p_10	0.304655	0.29837	0.188764	0.208211
p_11	0.231469	0.249458	0.237538	0.281534		p_11	0.269614	0.232553	0.225401	0.272432		p_11	0.213514	0.305834	0.191318	0.289334		p_11	0.290709	0.309959	0.184247	0.215085
p_12	0.265496	0.233203	0.235154	0.266147		p_12	0.271998	0.248375	0.236671	0.242956		p_12	0.309762	0.315655	0.185229	0.189354		p_12	0.292673	0.253781	0.234728	0.218818
p_13	0.243173	0.241439	0.257911	0.257477		p_13	0.286736	0.244907	0.199176	0.269181		p_13	0.313691	0.305637	0.169318	0.211353		p_13	0.333333	0.298566	0.159104	0.208996
p_14	0.240572	0.26528	0.208929	0.285219		p_14	0.270048	0.246424	0.201344	0.282185		p_14	0.265567	0.326262	0.152426	0.255745		p_14	0.299941	0.282656	0.159694	0.25771
p_15	0.262896	0.228869	0.236021	0.272215		p_15	0.259428	0.231253	0.207195	0.302124		p_15	0.314673	0.255745	0.169908	0.259674		p_15	0.285995	0.271852	0.165586	0.276566
p_16	0.241873	0.262029	0.205678	0.29042		p_16	0.282185	0.245774	0.208713	0.263329		p_16	0.269495	0.34178	0.156354	0.232371		p_16	0.319191	0.271263	0.165586	0.24396
p_17	0.268747	0.227568	0.237971	0.265713		p_17	0.281101	0.230386	0.203511	0.285002		p_17	0.356511	0.263406	0.160283	0.2198		p_17	0.320959	0.283441	0.170693	0.224907
p_18	0.252492	0.264846	0.217165	0.265496		p_18	0.27785	0.228218	0.229952	0.263979		p_18	0.263602	0.337065	0.175015	0.224317		p_18	0.334315	0.266549	0.159104	0.240031
p_19	0.275899	0.231686	0.222367	0.270048		p_19	0.279367	0.231036	0.217382	0.272215		p_19	0.323905	0.277549	0.163819	0.234728		p_19	0.301905	0.279316	0.174033	0.244746
p_2	0.274166	0.215431	0.213697	0.296706		p_2	0.273515	0.232987	0.235804	0.257694		p_2	0.318209	0.249853	0.182872	0.249067		p_2	0.320566	0.278334	0.193282	0.207818
p_20	0.246641	0.248808	0.217599	0.286953		p_20	0.288687	0.23212	0.214131	0.265063		p_20	0.283834	0.316441	0.173247	0.226478		p_20	0.316244	0.272049	0.173443	0.238264
p_21	0.261162	0.245557	0.228652	0.264629		p_21	0.276766	0.234504	0.205895	0.282835		p_21	0.299352	0.294245	0.165586	0.240817		p_21	0.324101	0.274209	0.166176	0.235514
p_3	0.272215	0.236888	0.223884	0.267013		p_3	0.286086	0.22085	0.220416	0.272648		p_3	0.286191	0.29012	0.176783	0.246906		p_3	0.320173	0.271656	0.192889	0.215282
p_4	0.26723	0.217382	0.221933	0.293455		p_4	0.275466	0.240139	0.219766	0.264629		p_4	0.296405	0.271852	0.18464	0.247103		p_4	0.296602	0.286584	0.185622	0.231192
p_5	0.274599	0.216298	0.228652	0.280451		p_5	0.291721	0.2215	0.227568	0.259211		p_5	0.302298	0.251228	0.187979	0.258495		p_5	0.329012	0.251817	0.185818	0.233353
p_6	0.26788	0.215431	0.233853	0.282835		p_6	0.256827	0.242306	0.230603	0.270264		p_6	0.287763	0.276174	0.1813	0.254763		p_6	0.291298	0.266942	0.186015	0.255745
p_7	0.269181	0.215865	0.231469	0.283485		p_7	0.290204	0.219549	0.246857	0.24339		p_7	0.328226	0.225496	0.193086	0.253192		p_7	0.34394	0.255745	0.189354	0.210961
p_8	0.279584	0.22085	0.221717	0.27785		p_8	0.274599	0.251625	0.234937	0.238838		p_8	0.335101	0.257317	0.176586	0.230996		p_8	0.340797	0.294048	0.178943	0.186211
p_9	0.268097	0.21088	0.250325	0.270698		p_9	0.298873	0.22085	0.243173	0.237104		p_9	0.335887	0.22471	0.186604	0.252799		p_9	0.360636	0.255549	0.195247	0.188568
S-M-RCA Start						S-M-RCA End						S-P-RCA Start						S-P-RCA End
position	A	C	G	T		position	A	C	G	T		position	A	C	G	T		position	A	C	G	T
p_1	0.278557	0.215531	0.230161	0.275751		p_1	0.282156	0.225708	0.24339	0.248746		p_1	0.273828	0.219038	0.231627	0.275507		p_1	0.287016	0.222276	0.234984	0.255725
p_10	0.249724	0.192906	0.295484	0.261887		p_10	0.257162	0.209555	0.297373	0.235909		p_10	0.248172	0.191824	0.233185	0.326819		p_10	0.266035	0.219638	0.262678	0.251648
p_11	0.196649	0.287318	0.211278	0.304755		p_11	0.167049	0.27272	0.292952	0.267279		p_11	0.191584	0.318547	0.225273	0.264597		p_11	0.235703	0.240858	0.235943	0.287496
p_12	0.263843	0.298886	0.267755	0.169516		p_12	0.302559	0.215676	0.293973	0.187792		p_12	0.29397	0.241937	0.235823	0.22827		p_12	0.263877	0.225033	0.322983	0.188107
p_13	0.237305	0.287743	0.216807	0.258144		p_13	0.262348	0.295163	0.194593	0.247896		p_13	0.256684	0.254046	0.219518	0.269752		p_13	0.322503	0.241578	0.192903	0.243016
p_14	0.179638	0.288169	0.164753	0.367441		p_14	0.220777	0.258352	0.144691	0.37618		p_14	0.222276	0.267594	0.192063	0.318067		p_14	0.266155	0.235104	0.180314	0.318427
p_15	0.197669	0.246066	0.168155	0.388109		p_15	0.219587	0.230553	0.1696	0.38026		p_15	0.231867	0.241698	0.190984	0.335451		p_15	0.264357	0.213643	0.191344	0.330656
p_16	0.22931	0.287148	0.164328	0.319214		p_16	0.243645	0.267534	0.161948	0.326872		p_16	0.233066	0.266275	0.19578	0.30488		p_16	0.274667	0.241098	0.18439	0.299844
p_17	0.308667	0.258144	0.187123	0.246066		p_17	0.319986	0.222562	0.202244	0.255207		p_17	0.283179	0.243616	0.203812	0.269392		p_17	0.305599	0.223115	0.214722	0.256564
p_18	0.273029	0.277112	0.186272	0.263588		p_18	0.285471	0.246621	0.192553	0.275355		p_18	0.266635	0.24961	0.204412	0.279343		p_18	0.292411	0.237382	0.204772	0.265436
p_19	0.273114	0.245556	0.198095	0.283236		p_19	0.287002	0.234549	0.203605	0.274845		p_19	0.255605	0.240499	0.212924	0.290972		p_19	0.287376	0.232946	0.203333	0.276346
p_2	0.2749	0.207876	0.233563	0.283661		p_2	0.271699	0.217121	0.259288	0.251892		p_2	0.290013	0.203812	0.223714	0.28246		p_2	0.27143	0.213883	0.254766	0.259921
p_20	0.242154	0.273964	0.206175	0.277707		p_20	0.272635	0.236929	0.208365	0.282071		p_20	0.242297	0.262319	0.202014	0.29337		p_20	0.28246	0.229948	0.214003	0.273588
p_21	0.24496	0.265204	0.22208	0.267755		p_21	0.276545	0.236674	0.211596	0.275185		p_21	0.258242	0.256564	0.21748	0.267714		p_21	0.292171	0.219518	0.211965	0.276346
p_3	0.276006	0.212384	0.242239	0.269371		p_3	0.288192	0.201139	0.267534	0.243135		p_3	0.285337	0.207289	0.234264	0.273109		p_3	0.273708	0.209807	0.265556	0.250929
p_4	0.28264	0.207281	0.225908	0.284171		p_4	0.281646	0.194083	0.246621	0.27765		p_4	0.281981	0.201654	0.214842	0.301523		p_4	0.294689	0.209687	0.242537	0.253087
p_5	0.265034	0.195458	0.246662	0.292847		p_5	0.265238	0.189407	0.279436	0.265919		p_5	0.266874	0.204772	0.232706	0.295648		p_5	0.274308	0.201894	0.255365	0.268433
p_6	0.244705	0.202688	0.23637	0.316237		p_6	0.24322	0.188727	0.259288	0.308765		p_6	0.263038	0.218079	0.229829	0.289054		p_6	0.265556	0.204292	0.245414	0.284738
p_7	0.329761	0.165178	0.263077	0.241983		p_7	0.321092	0.159823	0.294993	0.224092		p_7	0.308356	0.187507	0.23906	0.265076		p_7	0.299724	0.18523	0.280302	0.234744
p_8	0.380709	0.174704	0.227354	0.217232		p_8	0.391992	0.166709	0.235909	0.20539		p_8	0.334372	0.197458	0.220477	0.247692		p_8	0.344923	0.191464	0.233545	0.230068
p_9	0.377477	0.142723	0.262992	0.216807		p_9	0.37822	0.158208	0.285046	0.178526		p_9	0.327778	0.183191	0.234025	0.255005		p_9	0.323223	0.191344	0.272749	0.212684
Tn5-M-200-400 bp Start						Tn5-M-200-400 bp End						Tn5-M-1000 bp Start						Tn5-M-1000 bp End
Figure 6. Comparison of junctional nucleotide motif patterns

## Sheet: Figure 7
chromosome	ONT-P-1	ONT-P-2	Tn5-P-R-1	Tn5-P-R-2	ONT-non-1	ONT-non-2	Tn5-non-R-1	Tn5-non-R-2
chr1	4.85884	4.98352	4.82328	4.89812	4.95903	5.02955	5.33728	5.32709
chr2	3.92381	3.97999	4.07801	3.99569	3.64341	3.64472	4.07983	3.68956
chr3	4.64629	4.18018	4.56888	4.16198	3.52206	3.68845	3.82558	4.02046
chr4	3.80117	3.73624	4.04236	3.82594	2.78757	2.80782	3.09904	2.82066
chr5	4.08367	4.04061	4.27693	4.22374	3.28045	3.86548	4.61787	3.61108
chr6	4.49654	4.28663	4.63361	4.90035	4.20474	3.86516	4.22911	3.94858
chr7	4.68112	4.68345	4.69583	5.3691	4.13465	4.76693	4.321	4.2207
chr8	3.53133	3.74882	3.71299	4.08661	3.24436	3.20964	3.21259	3.14998
chr9	3.57666	3.49952	3.22232	3.41168	3.00217	3.34461	3.10729	3.79491
chr10	4.86243	4.81966	4.83467	4.31635	5.07203	4.73468	4.74885	5.2102
chr11	2.73831	3.10785	3.25954	4.01518	2.75347	2.87739	4.07759	3.70603
chr12	4.64685	4.54621	4.74794	4.69925	4.72077	4.08533	4.83997	4.22418
chr13	4.37488	4.49328	4.79421	3.94942	3.06209	3.45065	3.95032	3.65071
chr14	4.01143	3.52042	4.14854	4.39267	3.6042	3.35401	3.70138	3.6886
chr15	3.67921	3.61578	3.59002	3.16598	4.05433	3.43289	3.5768	3.01926
chr16	4.37331	4.75883	4.18821	4.44906	4.94962	5.09096	4.70675	4.5589
chr17	5.62468	5.84128	5.22099	5.44845	7.98457	7.02075	6.55792	6.64845
chr18	3.54905	3.01709	3.86644	2.76736	2.7078	2.32578	2.76539	3.19671
chr19	6.76593	7.00173	5.74992	6.17431	9.78825	9.92129	7.99566	7.86389
chr20	4.4618	4.38825	4.61818	4.45048	4.54374	5.47903	5.09843	5.24741
chr21	4.16373	4.27109	4.1606	4.11433	4.06628	3.58905	3.31018	3.80184
chr22	4.84767	5.07577	3.9166	4.60715	6.03456	6.42261	4.9917	6.39415
chrX	4.30127	4.40382	4.55462	4.26997	3.87988	3.9932	3.6384	4.1406
Figure7 (a) Pearson correlation analysis was conducted to examine the distribution of eccDNA on chromosomes between Nanopore sequencing and NGS.
group	ONT	ONT	NGS	NGS	ONT	ONT	NGS	NGS
element	ONT-P-1	ONT-P-2	Tn5-P-R-1	Tn5-P-R-2	ONT-non-1	ONT-non-2	Tn5-non-R-1	Tn5-non-R-2
CpG	2.9371	3.29504	3.55206	4.63971	3.9705	2.94403	6.88817	5.94813
Alu	5.46399	5.52868	4.38934	5.23629	6.13395	6.16984	6.96824	6.72035
5UTR	8.67693	8.69477	10.6512	13.5121	7.88297	7.53911	20.8119	19.3487
3UTR	2.68948	3.03277	3.39018	3.89937	2.50567	2.44143	5.54493	5.12768
exon	3.36042	3.5172	3.56271	4.247	3.11752	2.97795	5.72472	5.39195
intron	1.16213	1.18474	0.940384	1.08869	1.14968	1.13521	1.14863	1.1547
intergenic	0.980773	0.940458	0.806729	0.901374	0.870109	0.878252	0.886155	0.85528
Figure7 (b) Hierarchical clustering was used to compare the distribution of eccDNAs in different genomic elements between Nanopore sequencing and NGS.
position	A	C	G	T		position	A	C	G	T		position	A	C	G	T		position	A	C	G	T
p_1	0.269596	0.210914	0.242098	0.277392		p_1	0.272251	0.225482	0.230584	0.271684		p_1	0.269538	0.212117	0.226472	0.291873		p_1	0.287529	0.21887	0.220768	0.272833
p_10	0.233735	0.239121	0.245074	0.282069		p_10	0.262755	0.236111	0.225057	0.276077		p_10	0.222141	0.267007	0.231582	0.27927		p_10	0.295995	0.216048	0.219892	0.268065
p_11	0.254429	0.228916	0.241389	0.275266		p_11	0.282596	0.221939	0.231718	0.263747		p_11	0.261411	0.237275	0.228808	0.272506		p_11	0.27551	0.214442	0.237945	0.272104
p_12	0.248051	0.223813	0.244224	0.283912		p_12	0.262188	0.210601	0.244615	0.282596		p_12	0.253382	0.230852	0.221071	0.294696		p_12	0.2686	0.218675	0.243492	0.269233
p_13	0.235011	0.242807	0.232459	0.289724		p_13	0.260488	0.227324	0.233702	0.278486		p_13	0.238491	0.235426	0.207786	0.318297		p_13	0.283149	0.227823	0.217556	0.271471
p_14	0.235861	0.234302	0.227356	0.302481		p_14	0.255952	0.236961	0.221655	0.285431		p_14	0.237664	0.227981	0.202238	0.332117		p_14	0.268259	0.223979	0.208554	0.299207
p_15	0.234302	0.239405	0.232459	0.293834		p_15	0.26729	0.223639	0.221939	0.287132		p_15	0.241217	0.242141	0.202384	0.314258		p_15	0.268405	0.215561	0.206705	0.309328
p_16	0.236712	0.23331	0.232459	0.297519		p_16	0.264031	0.230159	0.223498	0.282313		p_16	0.259708	0.23674	0.205888	0.297664		p_16	0.268113	0.226656	0.205878	0.299353
p_17	0.237279	0.234018	0.229057	0.299646		p_17	0.268141	0.220238	0.227183	0.284439		p_17	0.249781	0.243504	0.207591	0.299124		p_17	0.28023	0.217848	0.207532	0.29439
p_18	0.247342	0.228065	0.231609	0.292984		p_18	0.264456	0.227466	0.230017	0.278061		p_18	0.258151	0.227981	0.207251	0.306618		p_18	0.283149	0.220233	0.201499	0.295119
p_19	0.235436	0.224238	0.236003	0.304323		p_19	0.279478	0.214286	0.218254	0.287982		p_19	0.242774	0.241703	0.209051	0.306472		p_19	0.282711	0.216778	0.206511	0.294
p_2	0.263218	0.21545	0.231325	0.290007		p_2	0.280471	0.224065	0.22619	0.269274		p_2	0.272019	0.209489	0.227397	0.291095		p_2	0.283539	0.224174	0.223201	0.269087
p_20	0.228632	0.239405	0.231751	0.300213		p_20	0.265306	0.228458	0.220238	0.285998		p_20	0.24871	0.235134	0.214599	0.301557		p_20	0.273807	0.222179	0.208457	0.295557
p_21	0.235152	0.236003	0.230191	0.298653		p_21	0.273243	0.22619	0.223923	0.276644		p_21	0.246959	0.235912	0.215766	0.301363		p_21	0.279938	0.22359	0.211133	0.285339
p_3	0.257831	0.210914	0.235011	0.296244		p_3	0.27877	0.233135	0.225057	0.263039		p_3	0.269684	0.210316	0.221946	0.298054		p_3	0.287918	0.218092	0.224028	0.269963
p_4	0.257264	0.215308	0.232601	0.294826		p_4	0.271117	0.223498	0.235686	0.2697		p_4	0.260195	0.213041	0.225012	0.301752		p_4	0.288356	0.215367	0.218967	0.27731
p_5	0.252162	0.207371	0.236145	0.304323		p_5	0.27877	0.227324	0.228175	0.265731		p_5	0.259903	0.208954	0.224185	0.306959		p_5	0.288064	0.215707	0.231035	0.265194
p_6	0.251453	0.214033	0.234869	0.299646		p_6	0.27466	0.224065	0.231859	0.269416		p_6	0.273431	0.202433	0.229586	0.29455		p_6	0.275753	0.214247	0.225488	0.284512
p_7	0.268179	0.215734	0.218852	0.297236		p_7	0.278203	0.21627	0.235544	0.269983		p_7	0.276448	0.212993	0.217129	0.293431		p_7	0.285874	0.206024	0.232397	0.275704
p_8	0.262225	0.218852	0.223104	0.295819		p_8	0.281321	0.223498	0.224773	0.270408		p_8	0.276399	0.209976	0.226521	0.287105		p_8	0.296774	0.209528	0.222763	0.270936
p_9	0.242807	0.211056	0.241389	0.304748		p_9	0.281746	0.217545	0.236111	0.264598		p_9	0.246667	0.214745	0.224331	0.314258		p_9	0.302564	0.2087	0.225877	0.262858
ONT-non-Start						ONT-non-End						ONT-P-Start						ONT-P-End
Figure7 (c) Motif analysis performed to investigate the flaking junctional sites using Nanopore sequencing.

## Sheet: Figur 8
group	cancer	cancer	nomal	nomal	nomal
sample	HepG2	MDA-MB-453	HL7702	MCF-12A	GES-1
CpG	4.77549	3.48285	9.31453	5.21271	4.64025
Alu	4.73097	3.96002	3.85762	5.2771	4.43952
5UTR	12.8832	10.0303	20.0184	16.7801	15.0725
3UTR	4.40422	4.25302	5.33018	5.63559	5.23282
exon	4.80804	4.70111	6.08917	4.92462	5.54522
intron	1.14314	1.12112	1.17608	1.18296	1.15051
intergenic	0.781139	0.791635	0.715451	0.774687	0.78048
Figure 8. Hierarchical clustering was performed to classify different cell lines based on the distribution of eccDNAs across various genomic elements.

## Sheet: Figur S2
S-RCA group	percentage of eccDNA-annotated gene
MssI	38.8817	S-M-R-1
MssI	37.4922	S-M-R-2
PacI	42.4278	S-P-R-1
PacI	44.9413	S-P-R-2
NotI	57.7134	S-N-R-1
NotI	51.5533	S-N-R-2
non-digestion	65.5541	S-non-R-1
non-digestion	55.0528	S-non-R-2
Tn5-RCA group	percentage of eccDNA-annotated gene
MssI	33.4034	Tn5-M-R-1
MssI	38.9632	Tn5-M-R-2
PacI	32.56	Tn5-P-R-1
PacI	31.8978	Tn5-P-R-2
NotI	47.9472	Tn5-N-R-1
NotI	48.3295	Tn5-N-R-2
non-digestion	50.3953	Tn5-no-R-1
non-digestion	45.7246	Tn5-no-R-2
Tn5-non-RCA group	percentage of eccDNA-annotated gene
MssI	25.2668	Tn5-M-1
MssI	31.6623	Tn5-M-2
PacI	33.7179	Tn5-P-1
PacI	37.96	Tn5-P-2
NotI	49.1244	Tn5-N-1
NotI	48.2676	Tn5-N-2
non-digestion	73.8462	Tn5-non-1
non-digestion	88.5965	Tn5-non-2
Supplementary Figure 2. A comparison of the percentage of eccDNA-annotated genes in different groups

## Sheet: Figur S3
position	A	C	G	T		position	A	C	G	T		position	A	C	G	T		position	A	C	G	T
p_1	0.270231	0.217422	0.230297	0.28205		p_1	0.273221	0.224541	0.252753	0.249485		p_1	0.265816	0.224036	0.241687	0.26846		p_1	0.26967	0.234326	0.251371	0.244632
p_10	0.24282	0.201428	0.271136	0.284615		p_10	0.255218	0.228514	0.276389	0.239879		p_10	0.232432	0.206188	0.285846	0.275534		p_10	0.253551	0.228777	0.286252	0.23142
p_11	0.196399	0.305085	0.215662	0.282855		p_11	0.195977	0.253457	0.275132	0.275434		p_11	0.190652	0.297547	0.224367	0.287433		p_11	0.187355	0.277598	0.282883	0.252164
p_12	0.270985	0.284665	0.256501	0.187849		p_12	0.284938	0.216445	0.307569	0.191049		p_12	0.261189	0.280822	0.273484	0.184505		p_12	0.291207	0.21246	0.298936	0.197397
p_13	0.233969	0.276115	0.22044	0.269476		p_13	0.282726	0.275786	0.197234	0.244254		p_13	0.231969	0.290805	0.230184	0.247042		p_13	0.267028	0.291603	0.202352	0.239017
p_14	0.197204	0.282553	0.178695	0.341548		p_14	0.231028	0.251044	0.165049	0.352879		p_14	0.194619	0.297019	0.178555	0.329808		p_14	0.224021	0.261875	0.174077	0.340028
p_15	0.209777	0.243173	0.177237	0.369813		p_15	0.234951	0.224692	0.181594	0.358763		p_15	0.210683	0.247835	0.187413	0.354069		p_15	0.224153	0.238158	0.194953	0.342736
p_16	0.228084	0.286426	0.178293	0.307197		p_16	0.252954	0.256827	0.180639	0.30958		p_16	0.227805	0.291994	0.180075	0.300126		p_16	0.24014	0.266367	0.184052	0.30944
p_17	0.288639	0.261228	0.195343	0.254791		p_17	0.306412	0.229771	0.213075	0.250742		p_17	0.286574	0.264758	0.203543	0.245125		p_17	0.303759	0.236441	0.222435	0.237365
p_18	0.263994	0.270734	0.193532	0.27174		p_18	0.289967	0.244053	0.19829	0.267689		p_18	0.257421	0.278773	0.200502	0.263304		p_18	0.277202	0.255136	0.208628	0.259034
p_19	0.261228	0.247699	0.211035	0.280038		p_19	0.28524	0.23304	0.208499	0.273221		p_19	0.264494	0.256164	0.212997	0.266345		p_19	0.279778	0.239149	0.212261	0.268812
p_2	0.267968	0.216315	0.23417	0.281547		p_2	0.268041	0.224089	0.256324	0.251546		p_2	0.268064	0.224631	0.244133	0.263172		p_2	0.26683	0.222765	0.267094	0.243311
p_20	0.245486	0.27013	0.202937	0.281446		p_20	0.273171	0.237063	0.213125	0.276641		p_20	0.243802	0.278178	0.211344	0.266675		p_20	0.263725	0.247275	0.219594	0.269406
p_21	0.245386	0.266811	0.220188	0.267616		p_21	0.281267	0.230123	0.219814	0.268796		p_21	0.244992	0.268791	0.225887	0.260329		p_21	0.272181	0.240999	0.221841	0.26498
p_3	0.272544	0.21717	0.238043	0.272243		p_3	0.277898	0.202816	0.273925	0.245361		p_3	0.275534	0.218616	0.243274	0.262577		p_3	0.276012	0.206976	0.278259	0.238753
p_4	0.274657	0.212443	0.225368	0.287532		p_4	0.276641	0.204224	0.254413	0.264722		p_4	0.260329	0.216831	0.246777	0.276063		p_4	0.274757	0.21246	0.250842	0.261941
p_5	0.269778	0.202132	0.245486	0.282603		p_5	0.268544	0.196027	0.269852	0.265577		p_5	0.263304	0.210749	0.245455	0.280492		p_5	0.261412	0.201823	0.275418	0.261346
p_6	0.25298	0.20847	0.228185	0.310366		p_6	0.2521	0.200905	0.259593	0.287403		p_6	0.240695	0.212997	0.233291	0.313016		p_6	0.245491	0.203805	0.263659	0.287045
p_7	0.309159	0.178846	0.253885	0.25811		p_7	0.310083	0.17747	0.285592	0.226854		p_7	0.302373	0.187215	0.265552	0.24486		p_7	0.298606	0.185836	0.298276	0.217282
p_8	0.352613	0.181512	0.234572	0.231303		p_8	0.360121	0.181544	0.245562	0.212773		p_8	0.345277	0.186554	0.24096	0.22721		p_8	0.360045	0.186431	0.249851	0.203673
p_9	0.351909	0.164211	0.25127	0.232611		p_9	0.340659	0.178476	0.286799	0.194066		p_9	0.340517	0.166788	0.265486	0.22721		p_9	0.336526	0.180419	0.294774	0.18828
Tn5-M Start						Tn5-M End						Tn5-P Start						Tn5-P End
position	A	C	G	T		position	A	C	G	T		position	A	C	G	T		position	A	C	G	T
p_1	0.281225	0.214634	0.221441	0.2827		p_1	0.281661	0.219246	0.241035	0.258057		p_1	0.279285	0.210209	0.220939	0.289568		p_1	0.294687	0.211162	0.228224	0.265927
p_10	0.269654	0.196029	0.227907	0.30641		p_10	0.258284	0.237744	0.243985	0.259986		p_10	0.256483	0.190015	0.23532	0.318182		p_10	0.269056	0.222413	0.242605	0.265927
p_11	0.237096	0.261373	0.229155	0.272377		p_11	0.256582	0.235474	0.224013	0.283931		p_11	0.210209	0.285469	0.218852	0.285469		p_11	0.242456	0.230236	0.237985	0.289323
p_12	0.278616	0.231197	0.229836	0.260352		p_12	0.269519	0.238652	0.255788	0.236042		p_12	0.297094	0.228316	0.222802	0.251788		p_12	0.284778	0.228224	0.275166	0.211832
p_13	0.258763	0.242881	0.22768	0.270675		p_13	0.302315	0.232978	0.207444	0.257263		p_13	0.264158	0.245604	0.213785	0.276453		p_13	0.308248	0.23955	0.194099	0.258103
p_14	0.242881	0.25139	0.207941	0.297788		p_14	0.278711	0.228552	0.201316	0.291421		p_14	0.235842	0.241952	0.193443	0.328763		p_14	0.259072	0.229342	0.188585	0.323001
p_15	0.258083	0.225978	0.211344	0.304594		p_15	0.273831	0.222651	0.217771	0.285747		p_15	0.245976	0.220715	0.194784	0.338525		p_15	0.26317	0.215483	0.19626	0.325088
p_16	0.252524	0.245831	0.210323	0.291322		p_16	0.284385	0.232183	0.205061	0.27837		p_16	0.254769	0.242399	0.181818	0.321013		p_16	0.278668	0.230385	0.185903	0.305044
p_17	0.273398	0.226659	0.221327	0.278616		p_17	0.295733	0.222537	0.221857	0.259873		p_17	0.287407	0.23152	0.197988	0.283085		p_17	0.313762	0.216452	0.198271	0.271515
p_18	0.262167	0.236756	0.20726	0.293817		p_18	0.287903	0.240695	0.210962	0.26044		p_18	0.275782	0.245231	0.192921	0.286066		p_18	0.289323	0.232546	0.200805	0.277327
p_19	0.269541	0.22734	0.219512	0.283607		p_19	0.295393	0.227531	0.204494	0.272583		p_19	0.277049	0.227422	0.197914	0.297615		p_19	0.297444	0.217271	0.199165	0.286119
p_2	0.272944	0.218945	0.218491	0.28962		p_2	0.281321	0.216636	0.242283	0.259759		p_2	0.288525	0.20544	0.216244	0.289791		p_2	0.295134	0.206542	0.235228	0.263095
p_20	0.2616	0.236415	0.219058	0.282927		p_20	0.285066	0.231729	0.203019	0.280186		p_20	0.26386	0.233308	0.198957	0.303875		p_20	0.296252	0.220401	0.203785	0.279562
p_21	0.261826	0.243335	0.223483	0.271356		p_21	0.295847	0.219133	0.209147	0.275874		p_21	0.261699	0.240238	0.206706	0.291356		p_21	0.293868	0.220103	0.207511	0.278519
p_3	0.277368	0.215201	0.225071	0.28236		p_3	0.282115	0.219473	0.241602	0.256809		p_3	0.28383	0.206557	0.220641	0.288972		p_3	0.30035	0.200954	0.235526	0.26317
p_4	0.271583	0.212252	0.221441	0.294725		p_4	0.292442	0.217204	0.225374	0.26498		p_4	0.285991	0.20462	0.206706	0.302683		p_4	0.299531	0.203264	0.233962	0.263244
p_5	0.268633	0.214294	0.22371	0.293364		p_5	0.276668	0.221516	0.240241	0.261575		p_5	0.276304	0.201118	0.222951	0.299627		p_5	0.294836	0.19544	0.24186	0.267864
p_6	0.263301	0.220647	0.218264	0.297788		p_6	0.282796	0.230822	0.21709	0.269292		p_6	0.25842	0.207377	0.222355	0.311848		p_6	0.276507	0.200283	0.22815	0.29506
p_7	0.285876	0.206807	0.226886	0.280431		p_7	0.289832	0.216409	0.237857	0.255901		p_7	0.298361	0.195604	0.234054	0.271982		p_7	0.322629	0.190969	0.238954	0.247448
p_8	0.291435	0.214974	0.207147	0.286444		p_8	0.294031	0.229346	0.230708	0.245915		p_8	0.331595	0.193145	0.207973	0.267288		p_8	0.337009	0.201997	0.219283	0.241711
p_9	0.289847	0.198639	0.235621	0.275893		p_9	0.294825	0.212438	0.244099	0.248638		p_9	0.328912	0.188599	0.2269	0.255589		p_9	0.327323	0.186126	0.242903	0.243648
Tn5-M-RCA Start						Tn5-M-RCA End						Tn5-P-RCA Start						Tn5-P-RCA End
position	A	C	G	T		position	A	C	G	T		position	A	C	G	T		position	A	C	G	T
p_1	0.308941	0.243096	0.198315	0.249649		p_1	0.295444	0.266635	0.210897	0.227024		p_1	0.275104	0.220349	0.213717	0.29083		p_1	0.277757	0.223759	0.241569	0.256915
p_10	0.302543	0.227649	0.198159	0.271649		p_10	0.263034	0.299202	0.214342	0.223423		p_10	0.242895	0.205191	0.239674	0.312239		p_10	0.2554	0.241379	0.252747	0.250474
p_11	0.240287	0.284756	0.202528	0.272429		p_11	0.304838	0.258024	0.204165	0.232973		p_11	0.210875	0.281357	0.220538	0.28723		p_11	0.238537	0.250474	0.239106	0.271883
p_12	0.296926	0.270401	0.210485	0.222188		p_12	0.280883	0.255049	0.223892	0.240175		p_12	0.278515	0.252558	0.23418	0.234748		p_12	0.294998	0.232853	0.258431	0.213717
p_13	0.270401	0.29599	0.20362	0.229989		p_13	0.324096	0.250352	0.195397	0.230155		p_13	0.259947	0.26241	0.213528	0.264115		p_13	0.299545	0.236832	0.203107	0.260515
p_14	0.27789	0.288969	0.181932	0.251209		p_14	0.286206	0.275716	0.18569	0.252388		p_14	0.238727	0.257294	0.204812	0.299166		p_14	0.263736	0.232474	0.199507	0.304282
p_15	0.286004	0.266032	0.199251	0.248713		p_15	0.303116	0.243463	0.196649	0.256772		p_15	0.252747	0.23399	0.20557	0.307692		p_15	0.260515	0.237022	0.197613	0.30485
p_16	0.271337	0.295834	0.182712	0.250117		p_16	0.302176	0.262251	0.18569	0.249883		p_16	0.252179	0.259757	0.193066	0.294998		p_16	0.286093	0.240243	0.186055	0.287609
p_17	0.306912	0.267124	0.19535	0.230613		p_17	0.315328	0.254736	0.200251	0.229685		p_17	0.286662	0.239295	0.207844	0.266199		p_17	0.311103	0.230959	0.194013	0.263926
p_18	0.260883	0.293806	0.189265	0.256046		p_18	0.31157	0.270706	0.185063	0.23266		p_18	0.268094	0.267336	0.19496	0.26961		p_18	0.294051	0.235506	0.205949	0.264494
p_19	0.301607	0.251365	0.19379	0.253238		p_19	0.310005	0.260999	0.180993	0.248004		p_19	0.270746	0.237969	0.203107	0.288177		p_19	0.29424	0.225843	0.201023	0.278894
p_2	0.293494	0.25277	0.197379	0.256358		p_2	0.313919	0.249883	0.212776	0.223423		p_2	0.274536	0.210686	0.23399	0.280788		p_2	0.295377	0.219591	0.235316	0.249716
p_20	0.272429	0.28694	0.19535	0.24528		p_20	0.308439	0.262878	0.189447	0.239236		p_20	0.258431	0.24479	0.208602	0.288177		p_20	0.299356	0.232285	0.207275	0.261084
p_21	0.290217	0.2665	0.202216	0.241067		p_21	0.31204	0.255049	0.180523	0.252388		p_21	0.256347	0.257294	0.211444	0.274915		p_21	0.297461	0.233611	0.206897	0.262031
p_3	0.302543	0.241691	0.206116	0.249649		p_3	0.290747	0.262878	0.215124	0.231251		p_3	0.266768	0.229822	0.225654	0.277757		p_3	0.291019	0.217507	0.24479	0.246684
p_4	0.281167	0.254798	0.203776	0.260259		p_4	0.317207	0.241271	0.209331	0.23219		p_4	0.276052	0.223759	0.210496	0.289693		p_4	0.286662	0.226412	0.242137	0.24479
p_5	0.298174	0.24684	0.195038	0.259947		p_5	0.28511	0.272585	0.221074	0.221231		p_5	0.271694	0.214286	0.220917	0.293103		p_5	0.287609	0.216749	0.246495	0.249147
p_6	0.286472	0.25511	0.196286	0.262131		p_6	0.290434	0.26961	0.195084	0.244872		p_6	0.255779	0.21637	0.223759	0.304092		p_6	0.272073	0.21997	0.228875	0.279083
p_7	0.294742	0.251833	0.199719	0.253706		p_7	0.307343	0.253171	0.216377	0.223109		p_7	0.283251	0.211633	0.237779	0.267336		p_7	0.325313	0.202728	0.239674	0.232285
p_8	0.32548	0.240131	0.183804	0.250585		p_8	0.28558	0.292313	0.208235	0.213872		p_8	0.312429	0.208412	0.213717	0.265441		p_8	0.324934	0.215612	0.232095	0.227359
p_9	0.291465	0.251053	0.21345	0.244032		p_9	0.334116	0.23861	0.218412	0.208862		p_9	0.321334	0.198939	0.227548	0.252179		p_9	0.313187	0.200265	0.256347	0.230201
S-M-RCA Start						S-M-RCA End						S-P-RCA Start						S-P-RCA End
